# Supplementary material for: Underlying mechanisms of the synergistic role of Li2MnO3 and LiNi1/3Co1/3Mn1/3O2 in high-Mn, Li-rich oxides
Source: Royal Society of Chemistry journal article supplement (doi:10.1039/c6cp00088f), 2016-01-01
Supplement: c6cp00088f1.pdf [file c6cp00088f1.pdf]

## Supporting Information for

# Underlying Mechanisms on Synergistic Role of $\text{Li}_2\text{MnO}_3$ and $\text{LiNi}_{1/3}\text{Co}_{1/3}\text{Mn}_{1/3}\text{O}_2$ in High-Mn, Li- rich Oxides

*Jin-Myoung Lim,<sup>a</sup> Duho Kim,<sup>a</sup> Min-Sik Park,<sup>b,d</sup> Maenghyo Cho,<sup>\*,a</sup> and Kyeongjae Cho<sup>\*,a,c</sup>*

<sup>a</sup> Department of Mechanical and Aerospace Engineering, Seoul National University, Gwanak-ro 1, Gwanak-gu, Seoul 08826, Republic of Korea.

<sup>b</sup> Advanced Batteries Research Center, Korea Electronics Technology Institute, 25 Saenari-ro, Bundang-gu, Seongnam, 13509, Republic of Korea.

<sup>c</sup> Department of Materials Science and Engineering and Department of Physics, the University of Texas at Dallas, Richardson, TX 75080, USA.

<sup>d</sup> Department of Advanced Materials Engineering for Information and Electronics, Kyung Hee University, 1732 Deogyong-daero, Giheung-gu, Yongin 17104, Republic of Korea.

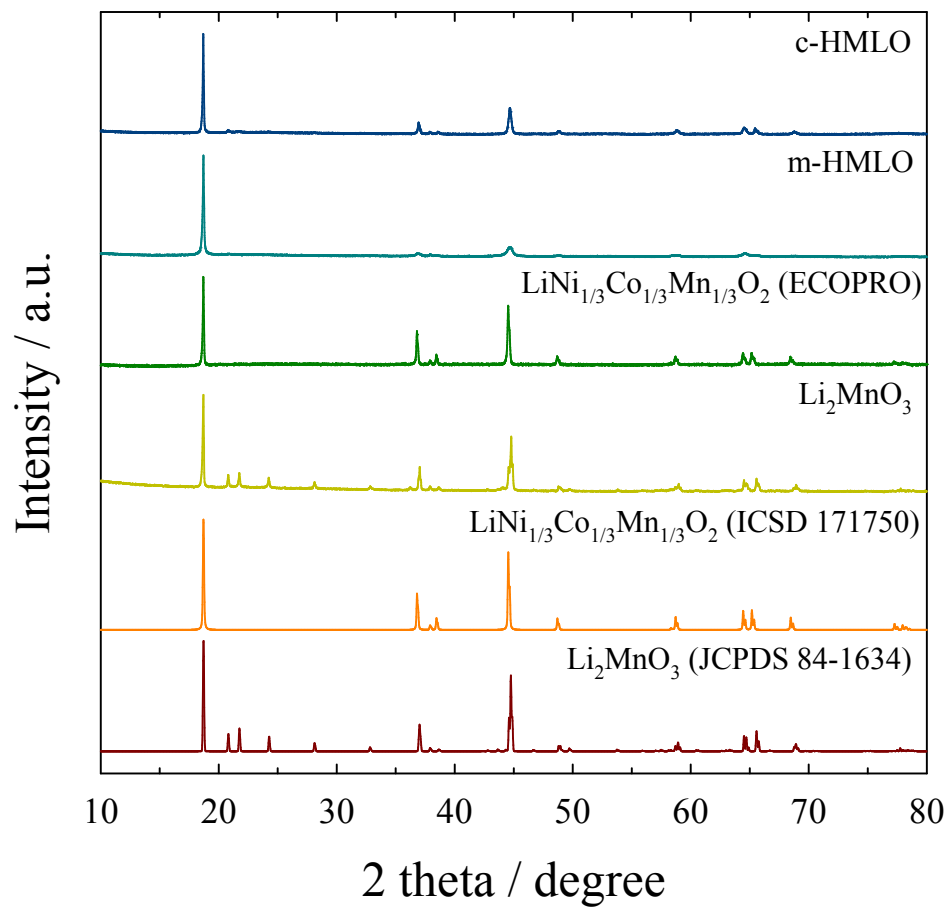

Figure S1. Powder XRD patterns of reference Li<sub>2</sub>MnO<sub>3</sub> (JCPDS 84-1634), reference LiNi<sub>1/3</sub>Co<sub>1/3</sub>Mn<sub>1/3</sub>O<sub>2</sub> (ICSD 171750), as-synthesized Li<sub>2</sub>MnO<sub>3</sub>, commercialized LiNi<sub>1/3</sub>Co<sub>1/3</sub>Mn<sub>1/3</sub>O<sub>2</sub> (ECOPRO), m-HMLO, and c-HMLO.

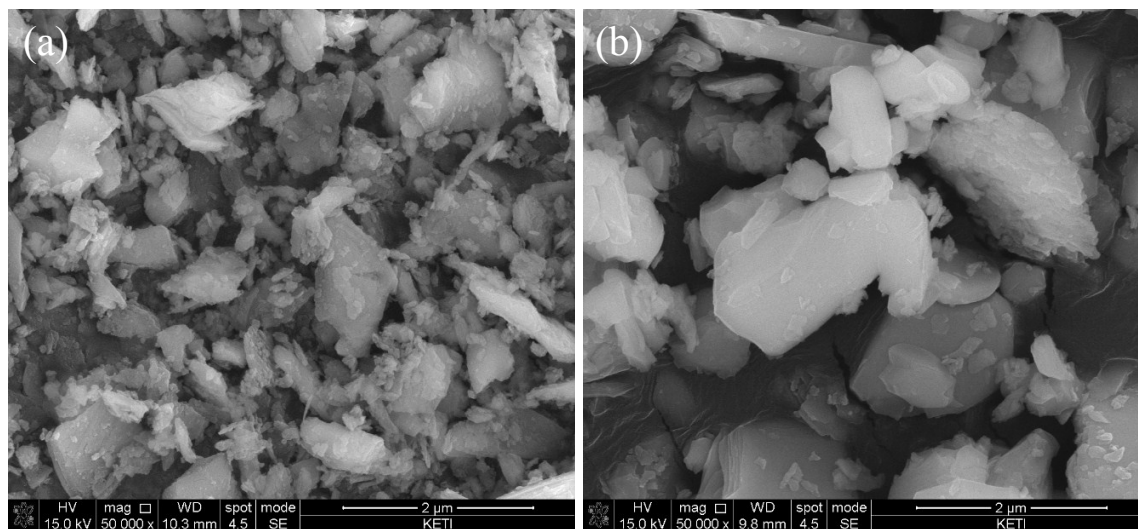

Figure S2. FESEM images of m-HMLO (a) and c-HMLO (b).

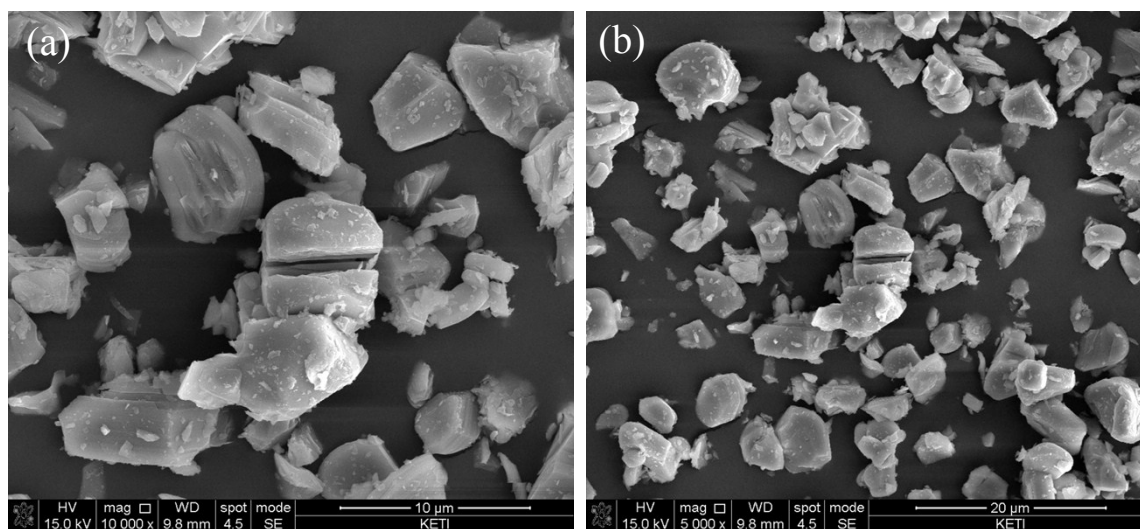

Figure S3. Field-emission scanning electron microscope (FESEM) images of as-synthesized  $\text{Li}_2\text{MnO}_3$  at low magnification (a) and high magnification (b).

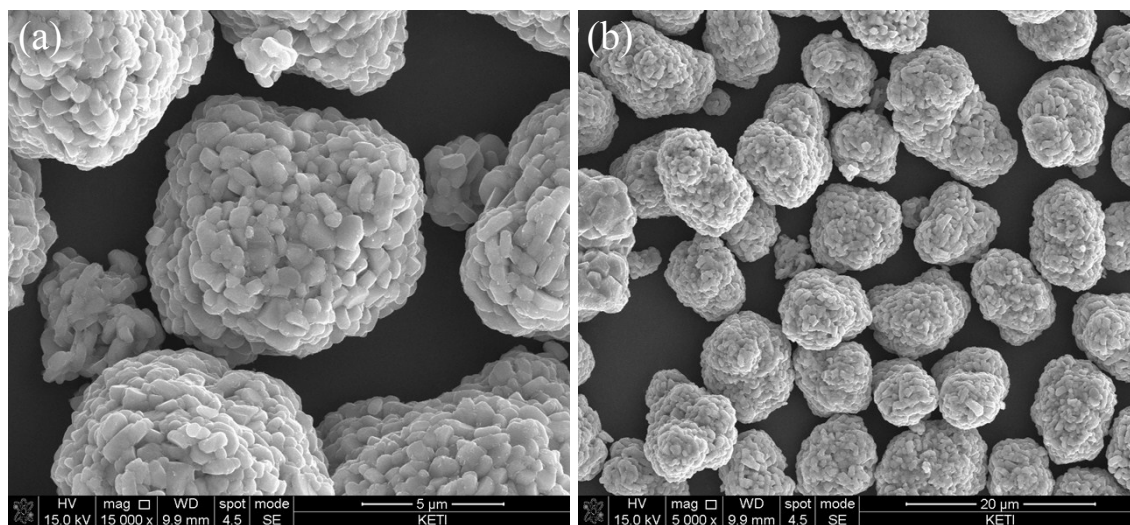

Figure S4. Field-emission scanning electron microscope (FESEM) images of commercialized  $\text{LiNi}_{1/3}\text{Co}_{1/3}\text{Mn}_{1/3}\text{O}_2$  at low magnification (a) and high magnification (b).

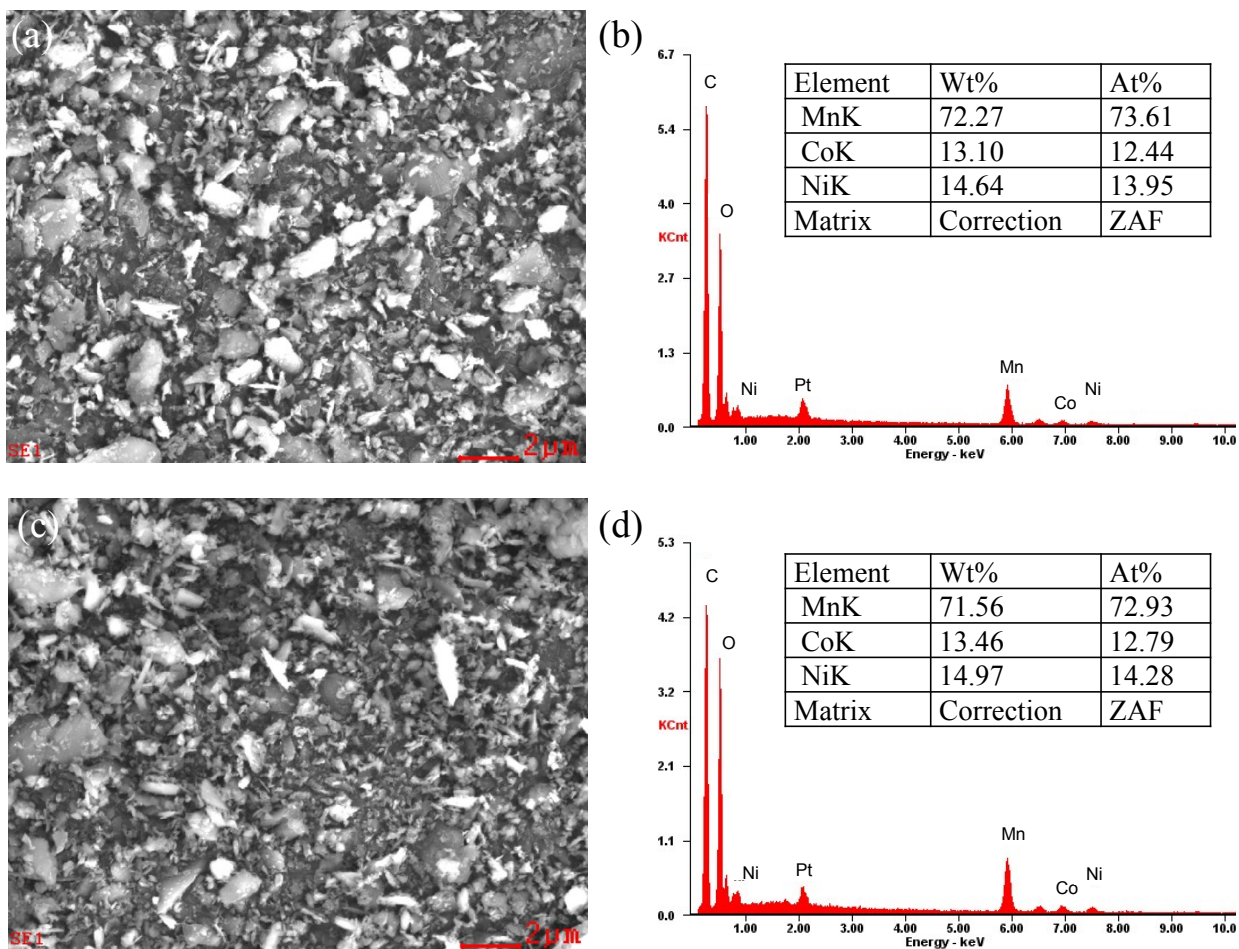

Figure S5. (a, c) FESEM images of m-HMLO at different two locations; (b, d) EDS patterns with the corresponding composition table.

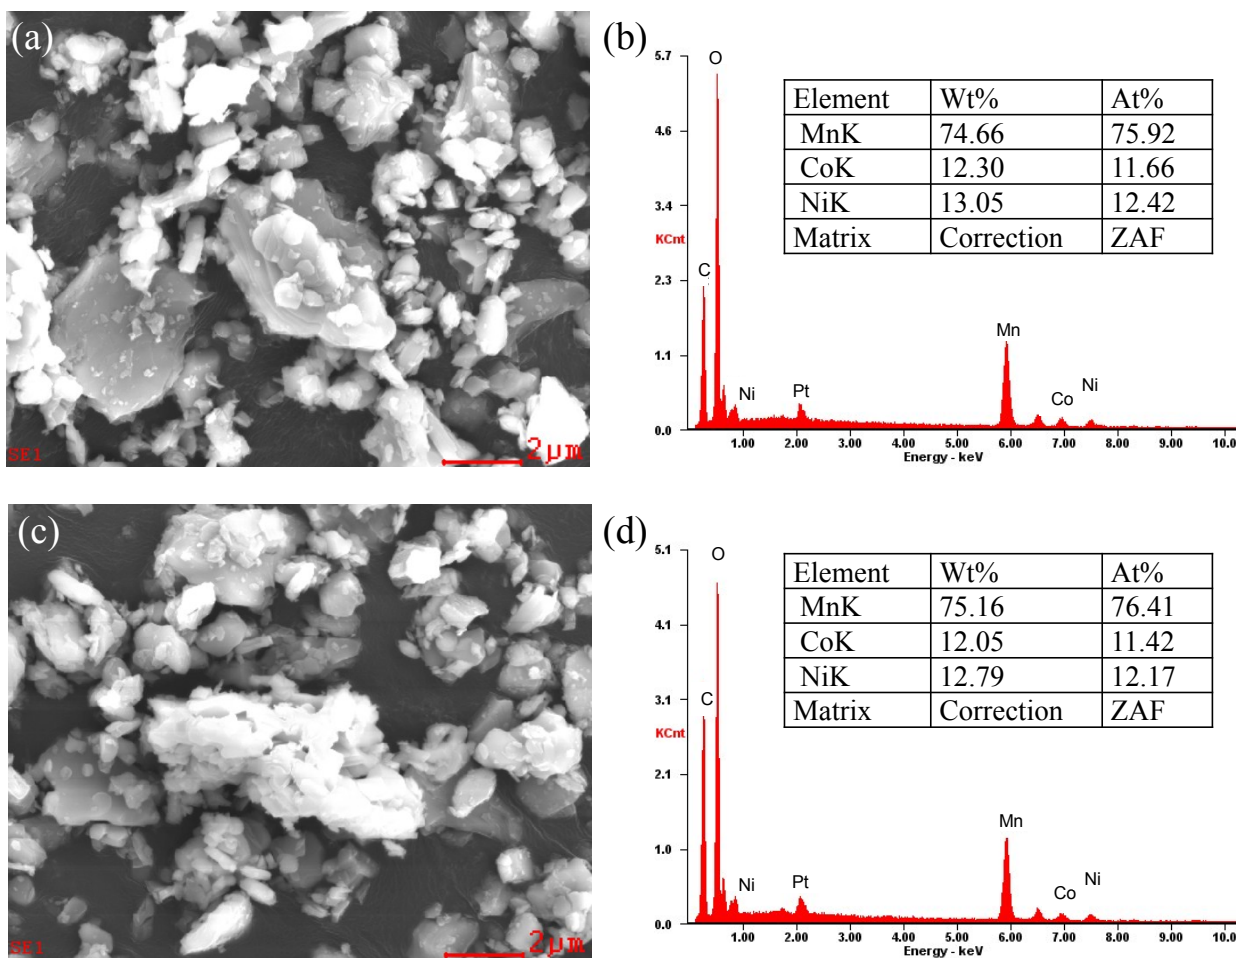

Figure S6. (a, c) FESEM images of c-HMLO at different two locations; (b, d) EDS patterns with the corresponding composition table.



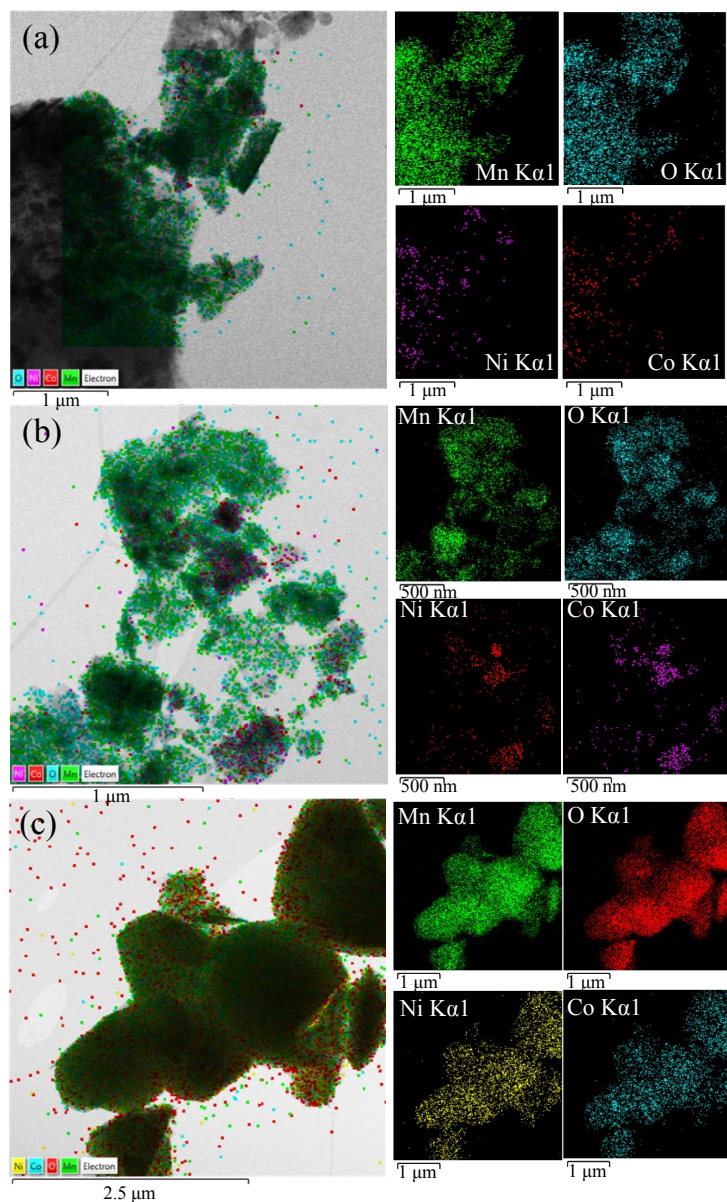

Figure S7. (a, b) STEM images of as-prepared m-HMLO with EDS elemental mapping of Mn (green), O (cyan), Ni (purple), and Co (red) in two different regions. (c) STEM image of as-prepared c-HMLO with EDS elemental mapping of Mn (green), O (red), Ni (yellow), and Co (cyan).



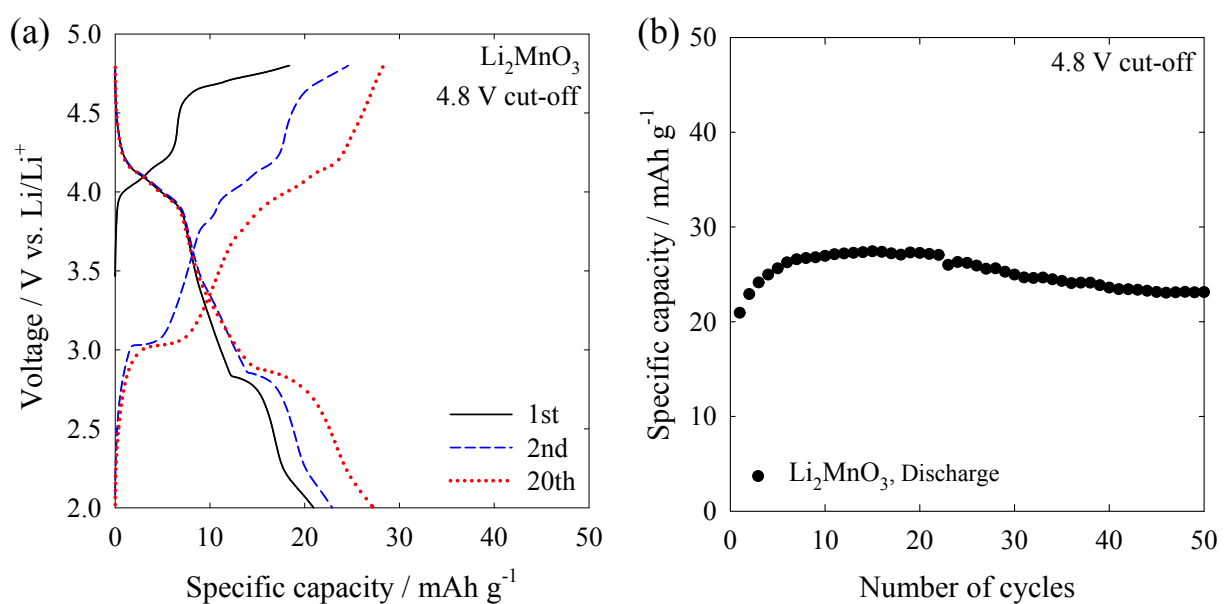

Figure S8. (a) Galvanostatic charge-discharge profiles of as-synthesized Li<sub>2</sub>MnO<sub>3</sub>, recorded in constant-current (CC) charging mode at a constant specific current of 13 mA g<sup>-1</sup>, in the voltage range between 2.0 and 4.8 V vs. Li/Li<sup>+</sup> at 1st, 2nd, and 20th cycles. (b) Discharge (filled black circles) cyclic performance of as-synthesized Li<sub>2</sub>MnO<sub>3</sub>.

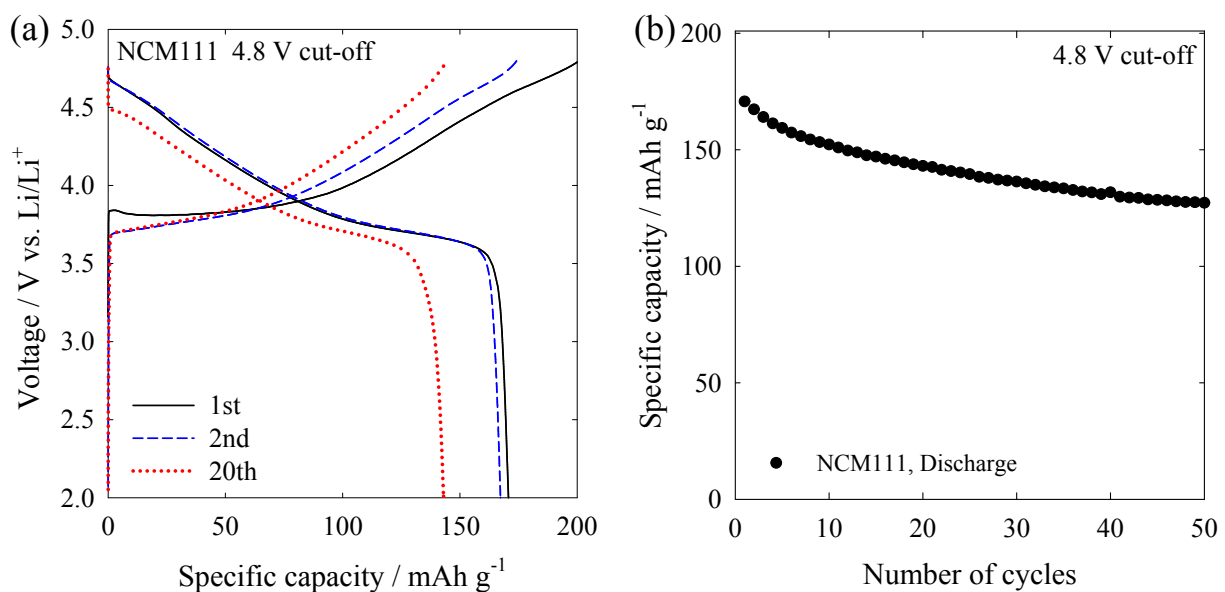

Figure S9. (a) Galvanostatic charge-discharge profiles of commercialized  $\text{LiNi}_{1/3}\text{Co}_{1/3}\text{Mn}_{1/3}\text{O}_2$  (NCM111) recorded in constant-current (CC) charging mode at a constant specific current of 25  $\text{mA g}^{-1}$ , in the voltage range between 2.0 and 4.8 V vs.  $\text{Li/Li}^+$  at 1st, 2nd, and 20th cycles. (b) Discharge (filled black circles) cyclic performance of commercialized  $\text{LiNi}_{1/3}\text{Co}_{1/3}\text{Mn}_{1/3}\text{O}_2$ .

Table S1. Comparison of structural parameters of as-prepared c-HMLO obtained from Rietveld refinement and the atomic model of  $\text{Li}_{1.67}\text{Ni}_{0.11}\text{Co}_{0.11}\text{Mn}_{0.67}\text{Cu}_{0.11}\text{O}_{2.67}$ , obtained by density functional theory (DFT) calculation.

|          | $a$ [Å] | $b$ [Å] | $c$ [Å] | $\beta$ [°] |
|----------|---------|---------|---------|-------------|
| Rietveld | 4.9369  | 17.0907 | 5.0268  | 109.29      |
| DFT      | 5.0076  | 17.3247 | 5.0867  | 109.42      |

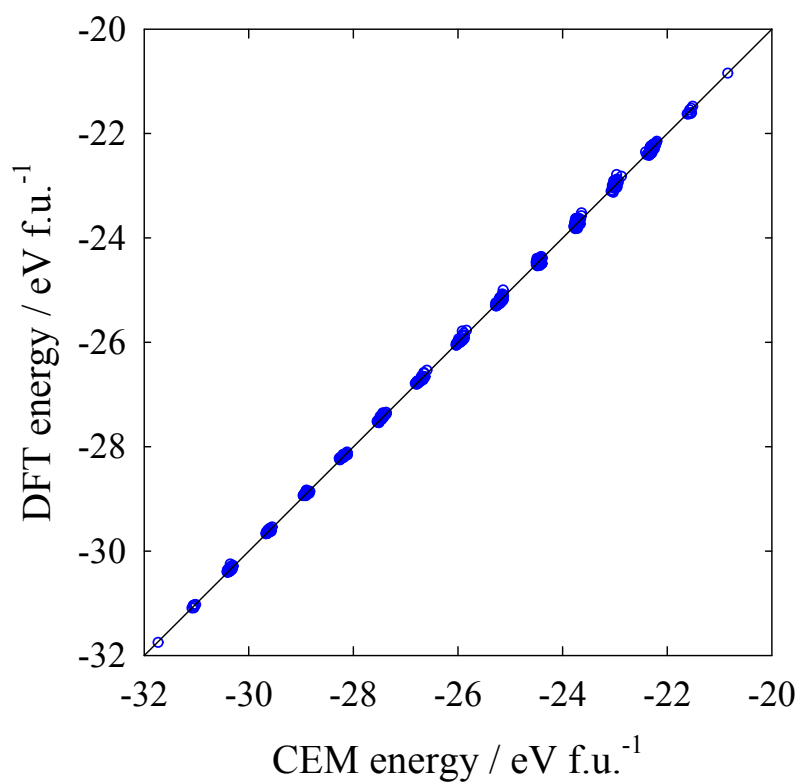

Figure S10. Total energy predicted by the cluster expansion method (CEM) vs. total energy calculated by density functional theory (DFT) for the same configuration (average root mean square error: 0.102 %).

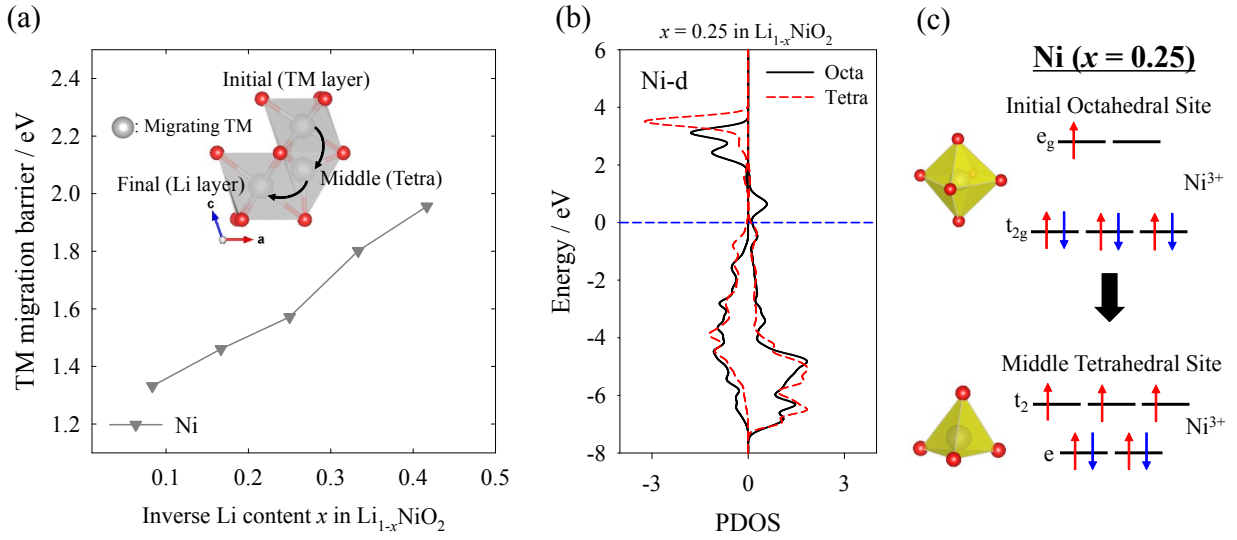

Figure S11. (a) Migration barriers of Ni ions with respect to the inverse Li content  $x$  in  $\text{Li}_{1-x}\text{NiO}_2$  from the initial TM layer to the final Li layer *via* the middle tetrahedral site (inset). (b) PDOS for Ni d-orbital at the initial octahedral site (black solid line) and middle tetrahedral site (red dashed line) at  $\text{Li}_{0.75}\text{NiO}_2$ , where the Fermi level is 0.0 eV (blue dashed line). (c) Corresponding CFSDs of Ni d-orbitals at the initial octahedral site (upper) and middle tetrahedral site (lower) for  $\text{Li}_{0.75}\text{NiO}_2$ .
